# Supplementary material for: Dynamic Characteristics of Periphytic Algae Communities on Different Substrates and the Host Response in Subtropical-Urban-Landscape Lakes
Source: MDPI journal article supplement (doi:10.3390/w15040639), 2023-02-06
Supplement: s1 [file s1]

# Dynamic Characteristics of Periphytic Algae Communities on Different Substrates and the Host Response in Subtropical-Urban-Landscape Lakes

Xue Peng, Suzhen Huang, Kelang Yi, Lu Zhang, Fangjie Ge, Qingwei Lin, Yi Zhang, Zhenbin Wu and Biyun Liu

**Table S1.** List of periphytic algae of *V. natans* and artificial *V. natans*.

| Phylum          | Genus             |                                                      | <i>V. natans</i> | Artificial<br><i>V. natans</i> |
|-----------------|-------------------|------------------------------------------------------|------------------|--------------------------------|
| Bacillariophyta | <i>Cocconeis</i>  | <i>Cocconeis placentula</i>                          | +                | +                              |
|                 | <i>Diatoma</i>    | <i>Diatoma vulgare</i>                               | +                | +                              |
|                 | <i>Achnanthes</i> | <i>Achnanthes minutissima</i>                        | +                | +                              |
|                 | <i>Eunotia</i>    | <i>Eunotia valida</i>                                | +                | +                              |
|                 |                   | <i>Eunotia pectinalis</i>                            | +                | +                              |
|                 |                   | <i>Eunotia robusta</i>                               | +                | +                              |
|                 |                   | <i>Eunotia perpusilla</i>                            | +                | +                              |
|                 | <i>Diploneis</i>  | <i>Diploneis ovalis</i>                              | +                | +                              |
|                 | <i>Pinnularia</i> | <i>Pinnularia viridis</i>                            | +                | +                              |
|                 |                   | <i>Pinnularia gibba</i>                              | +                |                                |
|                 | <i>Fragilia</i>   | <i>Fragilia capucina</i>                             | +                | +                              |
|                 |                   | <i>Fragilia granulate</i>                            | +                |                                |
|                 | <i>Synedra</i>    | <i>Synedra</i> sp.                                   | +                | +                              |
|                 |                   | <i>Synedra amphicephala</i>                          | +                | +                              |
|                 |                   | <i>Synedra acus</i>                                  | +                | +                              |
|                 | <i>Amphora</i>    | <i>Amphora</i> sp.                                   | +                | +                              |
|                 | <i>Navicula</i>   | <i>Navicula simplex</i>                              | +                | +                              |
|                 |                   | <i>Navicula</i> sp.                                  | +                | +                              |
|                 |                   | <i>Navicula graciloides</i>                          | +                | +                              |
|                 |                   | <i>Navicula decephala</i>                            | +                | +                              |
|                 |                   | <i>Navicula bicapitellata</i>                        | +                | +                              |
|                 |                   | <i>Navicula exigua</i>                               | +                | +                              |
|                 | <i>Cymbella</i>   | <i>Cymbella gracilis</i>                             | +                | +                              |
|                 |                   | <i>Cymbella affinis</i>                              | +                | +                              |
|                 |                   | <i>Cymbella cistula</i>                              | +                | +                              |
|                 |                   | <i>Cymbella pusilla</i>                              | +                | +                              |
|                 | <i>Gomphonema</i> | <i>Gomphonema angustatum</i>                         | +                | +                              |
|                 |                   | <i>Gomphonema acuminatum</i>                         | +                | +                              |
|                 |                   | <i>Gomphonema gracile</i>                            | +                | +                              |
|                 |                   | <i>Gomphonema acuminatum</i> var.<br><i>coronata</i> | +                | +                              |
|                 |                   | <i>Gomphonema constrictum</i>                        | +                | +                              |
|                 |                   | <i>Gomphonema augur</i>                              | +                | +                              |
|                 |                   | <i>Gomphonema</i> sp.                                |                  | +                              |
|                 | <i>Melosira</i>   | <i>Melosira granulate</i>                            | +                | +                              |
|                 |                   | <i>Melosira varians</i>                              |                  | +                              |
|                 | <i>Cyclotella</i> | <i>Cyclotella meneghiniana</i>                       | +                | +                              |
|                 |                   | <i>Cyclotella stelligera</i>                         | +                |                                |
|                 | <i>Nitzschia</i>  | <i>Nitzschia</i> sp.                                 | +                | +                              |
|                 | <i>Surirella</i>  | <i>Surirella</i> sp.                                 | +                |                                |
|                 |                   | <i>Surirella linenris</i>                            | +                |                                |
|                 |                   | <i>Surirella robusta</i>                             |                  | +                              |

|              |                        |                                   |   |   |
|--------------|------------------------|-----------------------------------|---|---|
| Chlorophyta  | <i>Tabellaria</i>      | <i>Tabellaria</i> sp.             | + | + |
|              | <i>Gyrosigma</i>       | <i>Gyrosigma</i> sp.              | + | + |
|              | <i>Cascinodiscus</i>   | <i>Cascinodiscus</i> sp.          | + |   |
|              | <i>Frustulia</i>       | <i>Frustulia</i> sp.              |   | + |
|              | <i>Ulothrix</i>        | <i>Ulothrix tenerrima</i>         | + | + |
|              | <i>Cladophora</i>      | <i>Cladophora oligoclona</i>      | + | + |
|              |                        | <i>Cladophora crispate</i>        | + | + |
|              |                        | <i>Cladophora oligoclada</i>      | + |   |
|              | <i>Chlorella</i>       | <i>Chlorella vulgaris</i>         | + | + |
|              | <i>Scenedesmus</i>     | <i>Scenedesmus bijuga</i>         | + | + |
|              |                        | <i>Scenedesmus quadricauda</i>    | + |   |
|              |                        | <i>Scenedesmus dimorphus</i>      |   | + |
|              | <i>Stigeoclonium</i>   | <i>Stigeoclonium aestivale</i>    | + | + |
|              | <i>Raphidonema</i>     | <i>Raphidonema nivale</i>         | + |   |
|              | <i>Characium</i>       | <i>Characium strictum</i>         | + | + |
|              | <i>Chamydomonas</i>    | <i>Chamydomonas ovalis</i>        | + | + |
|              | <i>Spirogyra</i>       | <i>Spirogyra</i> sp.              | + | + |
|              | <i>Ankistrodesmus</i>  | <i>Ankistrodesmus</i> sp.         | + |   |
|              | <i>Micractinium</i>    | <i>Micractinium</i> sp.           | + |   |
|              | <i>Eudorina</i>        | <i>Eudorina</i> sp.               | + |   |
|              | <i>Tetrastrum</i>      | <i>Tetrastrum hastiferum</i>      | + |   |
|              | <i>Protoderma</i>      | <i>Protoderma</i> sp.             |   | + |
|              | <i>Dictyosphaerium</i> | <i>Dictyosphaerium pulchellum</i> |   | + |
|              | <i>Desmidium</i>       | <i>Desmidium</i> sp.              |   | + |
|              | <i>Zygnema</i>         | <i>Zygnema</i> sp.                |   | + |
| Cyanophyta   | <i>Lyngbya</i>         | <i>Lyngbya perelagans</i>         | + | + |
|              | <i>Oscillatoria</i>    | <i>Oscillatoria minimum</i>       | + | + |
|              |                        | <i>Oscillatoria tenuis</i>        |   | + |
|              | <i>Aphanizomenon</i>   | <i>Aphanizomenon</i> sp.          | + |   |
|              | <i>Anabeana</i>        | <i>Anabeana</i> sp.               | + | + |
|              | <i>Pseudoanabaena</i>  | <i>Pseudoanabaena</i> sp.         | + | + |
|              | <i>Spirulina</i>       | <i>Spirulina platensis</i>        | + |   |
|              | <i>Phormidium</i>      | <i>Phormidium luridum</i>         | + | + |
|              | <i>Merismopedia</i>    | <i>Merismopedia punctate</i>      | + | + |
|              | <i>Oscillatoria</i>    | <i>Oscillatoria princeps</i>      | + | + |
| Cryptophyta  | <i>Rhabdoderma</i>     | <i>Rhabdoderma lineare</i>        | + |   |
|              | <i>Rivularia</i>       | <i>Rivularia</i> sp.              |   | + |
|              | <i>Cryptomons</i>      | <i>Cryptomons ovata</i>           | + |   |
|              |                        | <i>Cryptomons</i> sp.             | + |   |
| Pyrrophyta   | <i>Chroomonas</i>      | <i>Chroomonas acuta</i>           | + |   |
|              | <i>Gymnodinium</i>     | <i>Gymnodinium aerucyinosum</i>   | + | + |
| Chrysophyta  | <i>Peridinium</i>      | <i>Peridinium</i> sp.             | + | + |
|              | <i>Dinobryon</i>       | <i>Dinobryon sertularia</i>       | + | + |
| Xanthophyta  | <i>Mallomonas</i>      | <i>Mallomonas</i> sp.             | + | + |
|              | <i>Ophiocytium</i>     | <i>Ophiocytium capitatum</i>      | + |   |
| Euglenophyta | <i>Euglena</i>         | <i>Euglena gasterosteus</i>       | + |   |
|              |                        | <i>Euglena</i> sp.                | + |   |
